# Supplementary material for: An enrichment method based on synergistic and reversible covalent interactions for large-scale analysis of glycoproteins
Source: PubMed Central journal article supplement (PMC5923262; doi:10.1038/s41467-018-04081-3), 2018-04-27
Supplement: 41467_2018_4081_MOESM2_ESM.pdf [file 41467_2018_4081_MOESM2_ESM.pdf]

## Description of Additional Supplementary Files

File Name: Supplementary Data 1

Description: Protein N-glycosylation sites identified in duplicate yeast Experiments

File Name: Supplementary Data 2

Description: Unique O-glycopeptides identified in duplicate yeast Experiments

File Name: Supplementary Data 3

Description: Protein N-glycosylation sites identified in duplicate experiments in MCF7 cells

File Name: Supplementary Data 4

Description: Protein N-glycosylation sites identified in HEK 293T cells

File Name: Supplementary Data 5

Description: Protein N-glycosylation sites identified in Jurkat cells

File Name: Supplementary Data 6

Description: Protein N-glycosylation sites (4691) identified in MCF7, HEK 293T and Jurkat cells

File Name: Supplementary Data 7

Description: A total of 1906 N-glycoproteins identified in MCF7, HEK 293T and Jurkat cells

File Name: Supplementary Data 8

Description: Receptors (301) containing N-glycosylation sites identified in MCF7, HEK 293T and Jurkat cells

File Name: Supplementary Data 9

Description: Protein N-glycosylation sites identified in the mouse brain Tissues

File Name: Supplementary Data 10

Description: O-glycoproteins with one HexNAc identified in three types of human cells

File Name: Supplementary Data 11

Description: CDs identified in three types of human cells
